# Supplementary material
Source: PubMed Central journal article supplement (PMC9131897)
Supplement: NIHMS1777465-supplement-supplementary_material.pdf [file NIHMS1777465-supplement-supplementary_material.pdf]

## Supplemental Online Content

Der Sarkissian S, Hessam S, Kirby JS, et al. Identification of biomarkers and critical evaluation of biomarker validation in hidradenitis suppurativa: a systematic review. *JAMA Dermatol*. Published online January 19, 2022. doi:10.1001/jamadermatol.2021.4926

**eMethods.**

**eFigure.** PRISMA Diagram of Search Strategy

**eTable 1.** Interpretation of the four levels of evidence used in the GRADE profile

**eTable 2.** Susceptibility/ Risk Biomarkers

**eTable 3.** Diagnostic Biomarkers

**eTable 4.** Monitoring Biomarkers

**eTable 5.** Predictive Biomarkers

**eTable 6.** Limitations and Proposed Future Directions of Biomarker Research in HS

**eReferences.**

This supplemental material has been provided by the authors to give readers additional information about their work.

## **eMethods**

### **1) Protocol and Registration:**

This Study was registered with PROSPERO (Registration 230830) and conducted in line with the PRISMA checklist.

### **2) Eligibility Criteria:**

Eligibility criteria for this review included randomized controlled trials, uncontrolled clinical trials, cohort studies, case-control studies and other observational studies with no restrictions of patient age, sex, ethnicity or language of publication. Abstracts/conference presentations were included and are identified as such in the reference section.

Eligible studies included:

- Studies reporting the identification and/or evaluation of biomarkers in Hidradenitis Suppurativa / Acne Inversa.
- Studies may include identification and/or evaluation of clinical/phenotypic; imaging-based; tissue and/or blood/serum biomarkers.

Studies deemed not eligible for inclusion included:

- Studies not pertaining to Hidradenitis Suppurativa/ Acne Inversa
- Studies regarding patient reported outcomes such as pain or quality of life.
- Case Reports
- In-vitro or molecular studies with no correlated clinical data

### **3) Information Sources:**

- 1) Medline (1946-January 1 2021),
- 2) Embase (1980- January 1 2021)
- 3) Published Abstracts
- 5) Contact with Authors for abstracts without full text for clarification of data and methodology

### **4) Search Strategy:**

*((Hidradenitis Suppurativa OR Acne Inversa) AND (Biomarker OR subtype OR phenotype OR genotype OR endotype OR risk OR susceptibility OR diagnosis OR diagnostic OR monitoring OR activity OR severity OR prognosis OR progression OR predictive OR therapy OR therapeutic OR response OR safety OR pharmacodynamic))*

### **5) Study Selection:**

Period of the search was up to December 31, 2020. Data collection was performed independently by 2 authors (SDS and JWF) with any disagreements regarding inclusion of citations being referred to a third author for mediation. All results in the search strategy underwent title and abstract screening for relevance. Articles not meeting eligibility criteria were excluded. Full text screening of the remaining articles were undertaken by the same two independent authors. The information was collated using narrative synthesis classified by potential therapeutic target of interest.

## **6) Definitions of Biomarker types**

Categorization of manuscripts into biomarker type was performed independently by 2 authors (SDS and JWF) with any disagreements regarding inclusion of citations being referred to a third author for mediation. Biomarkers were defined using the FDA FDA Biomarkers, EndpointS and other Tools (BEST) glossary (<https://www.ncbi.nlm.nih.gov/books/NBK338448/>).

**SUSCEPTIBILITY/RISK BIOMARKERS:** A biomarker that indicates the potential for developing a disease or medical condition in an individual who does not currently have clinically apparent disease or the medical condition.

**DIAGNOSTIC BIOMARKERS:** A biomarker used to detect or confirm presence of a disease or condition of interest or to identify individuals with a subtype of the disease.

**MONITORING BIOMARKERS:** A biomarker measured repeatedly for assessing status of a disease or medical condition or for evidence of exposure to (or effect of) a medical product or an environmental agent.

**PREDICTIVE BIOMARKERS:** A biomarker used to identify individuals who are more likely than similar individuals without the biomarker to experience a favorable or unfavorable effect from exposure to a medical product or an environmental agent.

**PROGNOSTIC BIOMARKERS:** A biomarker used to identify likelihood of a clinical event, disease recurrence or progression in patients who have the disease or medical condition of interest.

**PHARMACODYNAMIC/RESPONSE BIOMARKER:** A biomarker used to show that a biological response has occurred in an individual who has been exposed to a medical product or an environmental agent.

**SAFETY BIOMARKERS:** A biomarker measured before or after an exposure to a medical product or an environmental agent to indicate the likelihood, presence, or extent of toxicity as an adverse effect.

## 6) Critical Evaluation of Biomarker Validation

Assessment of each identified biomarker was undertaken in line with the FDA and EMA guidelines for the validation of proposed biomarkers. Any biomarker able to answer ‘Yes’ to the questions under each section below was said to have met the referenced criterion. These criteria consisted of:

- 1) Univariate Correlation
  - a. Has the biomarker been studied in a single cohort or at a single site using univariate association with clinical outcomes (HISCR, Sartorius) and PROs (Pain, DLQI) compared to healthy control participants?
- 2) External Dataset Validation (“External Validation”)
  - a. Has the biomarker been identified as statistically significant in an independent study?
- 3) Analytical Validity Assessment (“Analytical Validation”) (Only 2 of the 3 questions below need to be answered in the positive in order to meet the criteria)
  - a. Pre-Analytical Validity- were the samples from disease and control consistent? Were they age and BMI matched?
  - b. Analytical Validity – Has the test for measuring biomarker levels undergone technical validation?
  - c. Post-Analytical Validity- Evaluation of dichotomous cutoffs for data interpretation
- 4) Clinical Validity Assessment (“Clinical Validation”)
  - a. Has the biomarker been used in the setting of a prospective clinical trial?
- 5) Clinical Utility Assessment (“Clinical Utility”)
  - a. Has the biomarker been shown to be clinically useful/meaningful in directing patient management?

Evaluation was undertaken independently by 2 authors (SDS and JWF) with any disagreements discussed between the authors and/or referred to a third author for mediation until consensus achieved. Across the 128 biomarkers identified, consensus was achieved between the two initial raters in 124/128 biomarkers (96.9%). Clarification of the criteria needed to achieve Analytical validity (achieving two out of three analytic criteria) increased the consensus rate to 100%. A roundtable discussion involving all authors was undertaken to ensure that consensus was achieved across the ratings of all identified biomarkers.

## 7) GRADE Assessment

The GRADE approach offers a system for rating quality of evidence, with a structured process for developing and presenting evidence summary and grading the strength of the overall published data. We included any identified biomarkers with one or more statistically significant

finding in individuals with HS. The following process was used to develop the GRADE ratings of identified biomarkers:

- 1) Data from observational studies were commenced at a “low” default rating, whilst data from randomized trials begin with a “high” default rating as per GRADE recommendations.
- 2) The decision to upgrade or downgrade an assessment level was made independently by 2 authors (SDS and JWF) with any disagreements regarding inclusion of citations being referred to a third author for mediation until consensus achieved. Reasons for upgrading or downgrading a rating include:
  - a. Reason for Upgrade:
    - i. Achieving ‘External Validation’
    - ii. Achieving ‘Analytical Validation’
    - iii. Achieving ‘Clinical Utility’

NB: Achieving ‘Clinical Validation’ was not considered a reason to upgrade GRADE rating as studies achieving this criterion begin at a default ‘high’ GRADE rating

- b. Reasons for Downgrade:
  - i. Broad ranges in effect size not explainable by inconsistent methodology or techniques
  - ii. Within-study bias (eg Abstract or Case Report)

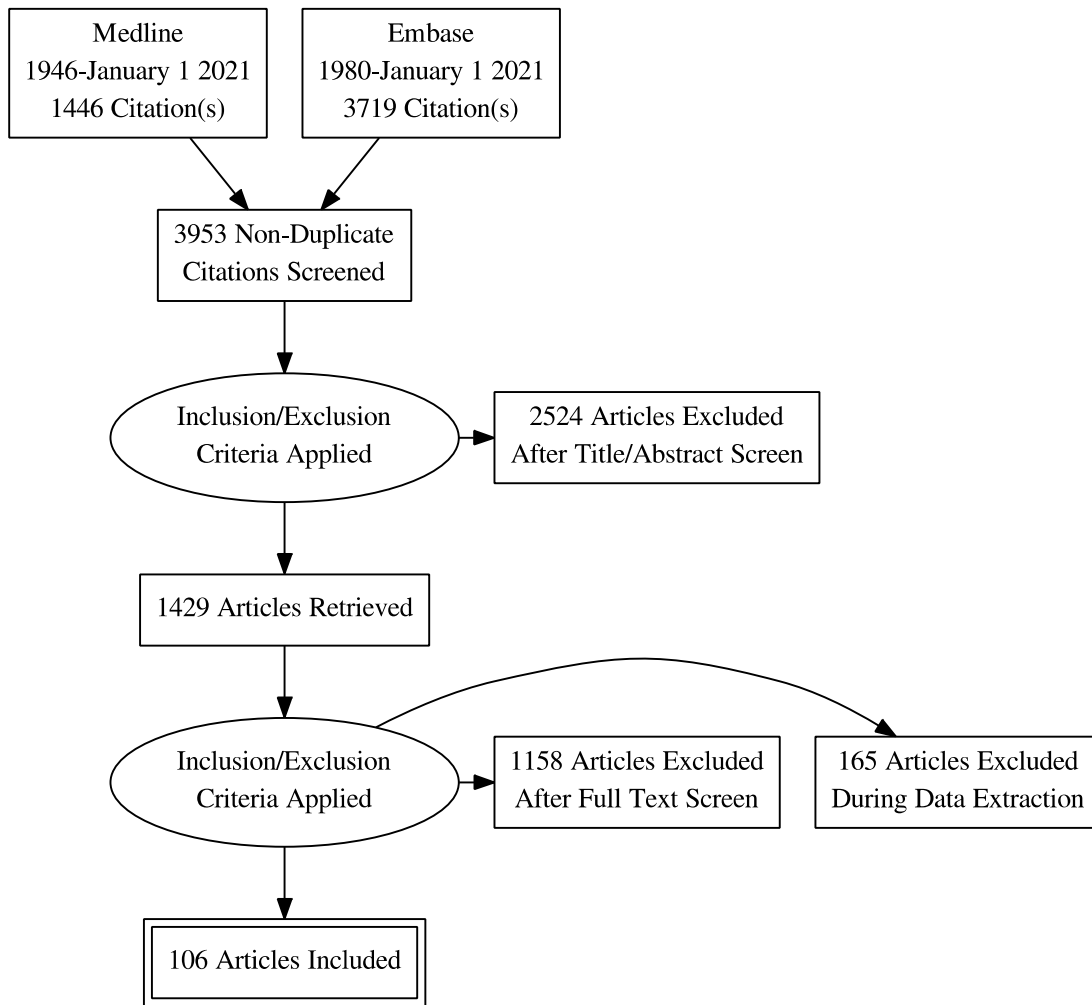

**eFigure: PRISMA Diagram of Search Strategy.** Figure describes the search search strategy and articles included and excluded.

**eTable 1: Interpretation of the four levels of evidence used in the GRADE profile**

| <b>Grade</b> | <b>Definition</b>                                                                                                                                                                      |
|--------------|----------------------------------------------------------------------------------------------------------------------------------------------------------------------------------------|
| High         | We are very confident that the true effect lies close to that of the estimate of the effect.                                                                                           |
| Moderate     | We are moderately confident in the effect estimate: the true effect is likely to be close to the estimate of the effect, but there is a possibility that it is substantially different |
| Low          | Our confidence in the effect estimate is limited: the true effect may be substantially different from the estimate of the effect.                                                      |
| Very Low     | We have very little confidence in the effect estimate: the true effect is likely to be substantially different from the estimate of effect                                             |

**eTable 2: Susceptibility/ Risk Biomarkers**

| Biomarker                                                    | Biomarker Level          |                                                          | Type of Study                     | Interpretation                                                                       | Critical Evaluation |                       |                     |                  | GRADE | References |
|--------------------------------------------------------------|--------------------------|----------------------------------------------------------|-----------------------------------|--------------------------------------------------------------------------------------|---------------------|-----------------------|---------------------|------------------|-------|------------|
|                                                              | HS                       | OR                                                       |                                   |                                                                                      | External Validation | Analytical Validation | Clinical Validation | Clinical Utility |       |            |
| Serum Epigenetic Markers                                     | Differentially Expressed | NR                                                       | Case-Control Study                | Association but no analysis of predictive power or potential                         | N                   | N                     | N                   | N                | Low   | Ref 10     |
| Tissue Epigenetic Markers                                    | Differentially Expressed | NR                                                       | Case-Control Study                | Association but no analysis of predictive power or potential                         | N                   | N                     | N                   | N                | Low   | Ref 11     |
| Serum RBP4                                                   | Increased                | OR = 3.86 (P < 0.001)                                    | Case-Control Regression Modelling | High serum RBP4 and levels were associated with an increased risk for HS             | N                   | N                     | N                   | N                | Low   | Ref 22     |
| Serum Ghrelin                                                | Decreased                | OR = 3.86 (P < 0.001)                                    | Case-Control Regression Modelling | Low ghrelin levels were associated with an increased risk for HS                     | N                   | N                     | N                   | N                | Low   | Ref 22     |
| Serum Visfatin                                               | Increased                | OR = 1.56 (P = 0.003)                                    | Case Control Regression Modelling | Increased serum visfatin increases the risk of HS                                    | N                   | N                     | N                   | N                | Low   | Ref 12     |
| BMI (Newborn)                                                | increased                | HR = 1.36 (lightest) - 1.39 (heaviest) babies (p = 0.04) | Regression modelling              | Both babies with lightest and heaviest weight are at increased risk of developing HS | N                   | N                     | N                   | N                | Low   | Ref 24     |
|                                                              | Decreased                | HR = 1.36 (p = 0.04)                                     |                                   |                                                                                      | N                   | N                     | N                   | N                |       |            |
| BMI (Children)                                               | Increased                | HR = 1.32 at 7 years to 1.50 at 13 years                 | Regression modelling              | Increasing BMI in childhood is associated with a greater risk of developing HS       | N                   | N                     | N                   | N                | Low   | Ref 24     |
| Depression, Type 1 diabetes, asthma, disease of vagina/vulva | Increased                | NR                                                       | Retrospective cohort              | The high preceding prevalence noted in this study suggests predictive potential      | N                   | N                     | N                   | N                | Low   | Ref 25     |
| TLR 10 single nucleotide polymorphisms                       | Not given                | NR                                                       | Case control                      | Association                                                                          | N                   | N                     | N                   | N                | Low   | Ref 23     |



**eTable 3: Diagnostic Biomarkers**

| Biomarker                    | Statistical Association          |                                                           | Type of Study                       | Interpretation                                                                                    | Critical Evaluation of Biomarkers |                                               |                     |                  | GRADE    | References |        |
|------------------------------|----------------------------------|-----------------------------------------------------------|-------------------------------------|---------------------------------------------------------------------------------------------------|-----------------------------------|-----------------------------------------------|---------------------|------------------|----------|------------|--------|
|                              | Population of Comparison         | Significance                                              |                                     |                                                                                                   | External Validation               | Analytical Validation                         | Clinical Validation | Clinical Utility |          |            |        |
| Tissue / Serum Lipocalin-2   | HC                               | P < 0.001                                                 | Observational Case Control          | Elevation associated with HS and severity of HS                                                   | N                                 | N Matched only for gender                     | N                   | N                | Low      | Ref 98     |        |
| Plasma Grehlin               | HC                               | OR = 3.86<br>P = 0.013                                    | Observational Case Control          | Decreased levels associated with HS                                                               | N                                 | N                                             | N                   | N                | Low      | Ref 22     |        |
| Plasma RBP4                  | HC                               | OR = 14.5<br>P < 0.0001                                   |                                     | Elevation associated with HS                                                                      | N                                 | N                                             | N                   | N                | Low      |            |        |
| Serum Ferritin               | HC                               | P < 0.001                                                 | Observational Case Control          | Decreased levels associated with HS                                                               | N                                 | N<br>Insufficient info on controls in Ref 34. | N                   | N                | Low      | Ref 34     |        |
| Serum Transferrin saturation | HC                               | P < 0.001                                                 | Observational Case Control          | Decreased levels associated with HS                                                               | N                                 | N<br>Insufficient info on controls in Ref 34. | N                   | N                | Low      | Ref 34     |        |
| Serum Iron                   | HC                               | P<0.001                                                   | Observational Case Control          | Decreased levels associated with HS                                                               | N                                 | N<br>Insufficient info on controls in Ref 34. | N                   | N                | Low      | Ref 34     |        |
| Tissue S100A4                | HC                               | P = 0.02                                                  | Observational Case Control          | Elevation associated with HS                                                                      | N                                 | N                                             | N                   | N                | Low      | Ref 39     |        |
| Serum sTNF-R1                | HC                               | P < 0.01                                                  | Observational Case Control          | Elevation associated with HS                                                                      | N                                 | N                                             | N                   | N                | Low      | Ref 37     |        |
| Serum Visfatin               | HC                               | P =0.02                                                   | Observational Case Control          | Elevation associated with HS                                                                      | N                                 | N                                             | N                   | N                | Low      | Ref 12     |        |
| Serum ASCA (IgG and IgA)     | HC                               | P <0.001                                                  | Observational Case Control          | Elevation associated with HS                                                                      | N                                 | N                                             | N                   | N                | Low      | Ref 100    |        |
| Serum MMP8                   | HC                               | P < 0.01                                                  | Observational Case Control          | Elevation associated with HS                                                                      | N                                 | N                                             | N                   | N                | Low      | Ref 101    |        |
| Tissue MMP8                  | HC                               | P < 0.01                                                  |                                     |                                                                                                   | N                                 | N                                             | N                   | N                | Low      | Ref 101    |        |
| Salivary Infrared Signatures | HC                               | P=0.00014                                                 | Observational Case Control          | Observational Study                                                                               | N                                 | N                                             | N                   | N                | Low      | Ref 102    |        |
| Fat percentage               | HC                               | P <0.0001                                                 | Univariate and Regression Modelling | High fat percentage, low muscle percentage and higher basal metabolic rate are associated with HS | N                                 | N                                             | N                   | N                | Low      | Ref 103    |        |
| Muscle percentage            | HC                               | P < 0.0001                                                |                                     |                                                                                                   | N                                 | N                                             | N                   | N                | Low      |            |        |
| Bone mass percentage         | HC                               | P < 0.0001                                                |                                     |                                                                                                   | N                                 | N                                             | N                   | N                | Low      |            |        |
| Waist circumference          | HC                               | P < 0.0001                                                |                                     |                                                                                                   | N                                 | N                                             | N                   | N                | Low      |            |        |
| Waist/ hip ratio             | HC                               | P < 0.0001                                                |                                     |                                                                                                   | N                                 | N                                             | N                   | N                | Low      |            |        |
| BMR                          | HC                               | P < 0.0001                                                |                                     |                                                                                                   | N                                 | N                                             | N                   | N                | Low      |            |        |
| Serum natural T-regs         | HC                               | P = 0.0012                                                |                                     |                                                                                                   | Observational Case Control        | Decreased levels associated with HS           | N                   | N                | N        |            | N      |
| Serum T-cells                | HC                               | Naïve T-cells (P = 0.0347)<br>Memory T-cells (P = 0.0264) | Observational Case Control          | Decreased levels associated with HS                                                               | N                                 | N                                             | N                   | N                | Low      | Ref 104    |        |
| Tissue CCL-26                | HC                               | P = 0.004                                                 | Observational Case Control          | Elevation Associated with HS                                                                      | N                                 | N                                             | N                   | N                | Low      | Ref 106    |        |
| Leukotriene B4               | HC                               | P <0.001                                                  | Observational Case Control          | Elevation Associated with HS                                                                      | N                                 | N                                             | N                   | N                | Low      | Ref 107    |        |
|                              | Acinetobacter / Moraxella (HC)   | P = 0.1                                                   |                                     |                                                                                                   | Y                                 | N                                             | N                   | N                | Moderate |            |        |
|                              | Staphylococcus                   | Not given                                                 |                                     |                                                                                                   | Y                                 | N                                             | N                   | N                | Moderate |            |        |
|                              | Porphyromonas Peptoniphilus (HC) | P = 0.02                                                  |                                     |                                                                                                   | Y                                 | N                                             | N                   | N                | Moderate |            |        |
|                              | Propionibacterium acnes (NLT)    | P < 0.001                                                 |                                     |                                                                                                   | Y                                 | N                                             | N                   | N                | Moderate |            |        |
| Tissue IL-1RA                | Non-Lesional Tissue              | 1.5 fold increase<br>P=0.0112                             | Observational Case Control          | Elevation Associated with HS                                                                      | N                                 | N                                             | N                   | N                | Low      | Ref 55     |        |
| Tissue IL-1B                 | HC                               | 31 fold increase<br>P=0.0028                              | Observational Case Control          | Elevation Associated with HS                                                                      | Y                                 | N                                             | N                   | N                | Moderate | Ref 31     |        |
|                              | Non-Lesional Tissue              | P<0.001                                                   |                                     |                                                                                                   |                                   |                                               |                     |                  |          |            | Ref 30 |
|                              | Non-Lesional Tissue              | P<0.001                                                   |                                     |                                                                                                   |                                   |                                               |                     |                  |          |            | Ref 55 |
| Tissue IL-6                  | Non-Lesional Tissue              | P=0.05                                                    | Observational Case Control          | Elevation Associated with HS                                                                      | N                                 | N                                             | N                   | N                | Low      | Ref 38     |        |
| Serum IL-6R                  | HC                               | 3.7 fold increase<br>P=0.0028                             | Observational Case Control          | Elevation Associated with HS                                                                      | N                                 | N                                             | N                   | N                | Low      | Ref 48     |        |
| Serum IL-10                  | Non-Lesional Tissue              | 34 fold increase<br>P=0.05                                | Observational Case Control          | Elevation Associated with HS                                                                      | N                                 | N                                             | N                   | N                | Low      | Ref 38     |        |
| Tissue IL-11                 | Non-Lesional Tissue              | 11 fold increase<br>P=0.0056                              | Observational Case Control          | Elevation Associated with HS                                                                      | N                                 | N                                             | N                   | N                | Low      | Ref 113    |        |
| Tissue IL-16                 | Non-Lesional Tissue              | 5.3 fold increase<br>P=0.0028                             | Observational Case Control          | Elevation Associated with HS                                                                      | N                                 | N                                             | N                   | N                | Low      | Ref 113    |        |
| Tissue IL-17C                | Non-Lesional Tissue              | P<0.01                                                    | Observational Case Control          | Elevation Associated with HS                                                                      | N                                 | N                                             | N                   | N                | Low      | Ref 56     |        |
| Serum IL-32                  | HC                               | P=0.01                                                    | Observational Case Control          | Elevation Associated with HS                                                                      | N                                 | N                                             | N                   | N                | Low      | Ref 114    |        |

|                                                                    |                     |                                       |                                  |                                     |   |   |   |   |     |                  |
|--------------------------------------------------------------------|---------------------|---------------------------------------|----------------------------------|-------------------------------------|---|---|---|---|-----|------------------|
| Tissue IL-32a                                                      | Non-Lesional Tissue | P=0.01                                | Observational Case Control       | Elevation Associated with HS        | N | N | N | N | Low | Ref 114          |
| Tissue IL-32 B                                                     |                     | P=0.0001                              | Observational Case Control       | Elevation Associated with HS        | N | N | N | N | Low |                  |
| Tissue IL32g                                                       |                     | P=0.0161                              | Observational Case Control       | Elevation Associated with HS        | N | N | N | N | Low |                  |
| Serum IL-36a<br>Serum IL-36B<br>Serum IL-36 g<br>Serum IL-36RA     | HC                  |                                       | Observational Case Control       | Elevation Associated with HS        | N | N | N | N | Low | Ref 115          |
| Tissue IL-36a                                                      | HC                  | P = 0.0174                            | Observational Case Control       | Elevation Associated with HS        | N | N | N | N | Low | Ref 116          |
| Tissue IL-36B                                                      |                     | P = 0.0001                            |                                  |                                     |   |   |   |   |     |                  |
| Tissue IL36g                                                       |                     | P = 0.0161                            |                                  |                                     |   |   |   |   |     |                  |
| Tissue IL36RA                                                      |                     | P = 0.0001                            |                                  |                                     |   |   |   |   |     |                  |
| Tissue IL37                                                        | HC                  | P = 0.0001                            | Observational Case Control       | Elevation associated with HS Tissue | N | N | N | N | Low | Ref 116          |
| Tissue IL38                                                        | HC                  | P = 0.0069                            | Observational Case Control       | Elevation associated with HS Tissue | N | N | N | N | Low | Ref 116          |
| Serum TNF-a                                                        | Non-Lesional Tissue | P=0.02                                | Observational Case Control       | Elevation Associated with HS        | N | N | N | N | Low | Ref 47           |
| Serum total monocytes (absolute count)                             | HC                  | HC vs. Hurley Stage III<br>P = 0.004  | Observational Case Control       | Elevation associated with HS Tissue | N | N | N | N | Low | Ref 47           |
| Serum CD14 <sup>bright</sup> /CD16 <sup>dim</sup> (absolute count) | HC                  | HC vs. Hurley Stage III:<br>P = 0.001 | Observational Case Control       | Elevation associated with HS Tissue | N | N | N | N | Low | Ref 47           |
| Serum patrolling monocytes (absolute count)                        | HC                  | HC vs. Hurley Stage III:<br>P = 0.037 | Observational Case Control       | Elevation associated with HS Tissue | N | N | N | N | Low | Ref 47           |
| Tissue TNF-a                                                       | Non-Lesional Tissue | P=0.01                                | Observational Case Control       | Elevation Associated with HS        | N | N | N | N | Low | Ref 31           |
|                                                                    |                     | P<0.01                                |                                  |                                     |   |   |   |   |     | Ref 32           |
|                                                                    |                     | P<0.001                               |                                  |                                     |   |   |   |   |     | Ref 33           |
|                                                                    |                     | P<0.05                                |                                  |                                     |   |   |   |   |     | Ref 55           |
|                                                                    |                     | NS                                    |                                  |                                     |   |   |   |   |     | Ref 40           |
| Serum TNFR2                                                        | HC                  | P=0.0028                              | Observational Case Control       | Elevation Associated with HS        | N | N | N | N | Low | Ref 32           |
| Tissue hBD3                                                        | HC                  | P = 0.004                             | Observational Case Control       | Elevation Associated with HS        | N | N | N | N | Low | Ref 31           |
| Tissue hBD1                                                        | HC                  | P = 0.014                             | Observational Case Control       | Elevation Associated with HS        | N | N | N | N | Low | Ref 31           |
| Tissue hBD2                                                        | HC                  | P < 0.001                             | Observational Case Control       | Elevation Associated with HS        | N | N | N | N | Low | Ref 31           |
| Serum s100A7                                                       | HC                  | P<0.001                               | Observational Case Control       | Elevation Associated with HS        | N | N | N | N | Low | Ref 41           |
| Tissue LL37                                                        | Non-Lesional Tissue | P<0.05                                | Observational Case Control       | Elevation Associated with HS        | N | N | N | N | Low | Ref 41           |
| Tissue a-MSH                                                       | Non-Lesional Tissue | P<0.01                                | Observational Case Control       | Elevation Associated with HS        | N | N | N | N | Low | Ref 41           |
| Tissue CCL3                                                        | Non-Lesional Tissue | P=0.0196                              | Observational Case Control       | Elevation Associated with HS        | N | N | N | N | Low | Ref 32           |
| Tissue CCL5                                                        | Non-Lesional Tissue | P = 0.0112                            | Observational Case Control       | Elevation Associated with HS        | N | N | N | N | Low | Ref 32           |
| Tissue CCL20                                                       | Non-Lesional Tissue | P<0.05                                | Observational Case Control       | Elevation Associated with HS        | Y | N | N | N | Low | Ref 31<br>Ref 40 |
| Tissue CCL27                                                       | Non-Lesional Tissue | P<0.05                                | Observational Case Control       | Elevation Associated with HS        | N | N | N | N | Low | Ref 40           |
| Serum ESR                                                          | HC                  | P<0.001                               | Observational Case Control       | Elevation Associated with HS        | N | N | N | N | Low | Ref 37           |
|                                                                    |                     | P<0.01                                | Multivariate Logistic Regression |                                     |   |   |   |   |     | Ref 45           |
| Serum IFNg                                                         | HC                  | P=0.027                               | Observational Case Control       | Elevation Associated with HS        | Y | N | N | N | Low | Ref 31           |
|                                                                    |                     | p=NS                                  |                                  |                                     |   |   |   |   |     | Ref 40           |
| Serum MMP2                                                         | HC                  | P<0.05                                | Observational Case Control       | Elevation Associated with HS        | N | N | N | N | Low | Ref 31           |
| Tissue BLC                                                         | Non-Lesional Tissue | 10.5 fold increase<br>P=0.0056        | Observational Case Control       | Elevation Associated with HS        | N | N | N | N | Low | Ref 30           |
| Tissue ICAM1                                                       | Non-Lesional Tissue | 3.1 fold increase<br>P=0.0028         | Observational Case Control       | Elevation Associated with HS        | N | N | N | N | Low | Ref 115          |
| Tissue CXCL9                                                       | Non-Lesional Tissue | 16 fold increase<br>P=0.0028          | Observational Case Control       | Elevation Associated with HS        | N | N | N | N | Low | Ref 30           |

Legend: \*Abstract Only

**eTable 4: Monitoring Biomarkers**

| Biomarker                                                                                                              | Disease Severity Association |                                                                                                                                                                                                               | Type of Study                                               | Interpretation                                                                                                                           | Critical Evaluation |                       |                     |                  | GRADE Evidence Profile | Reference  |
|------------------------------------------------------------------------------------------------------------------------|------------------------------|---------------------------------------------------------------------------------------------------------------------------------------------------------------------------------------------------------------|-------------------------------------------------------------|------------------------------------------------------------------------------------------------------------------------------------------|---------------------|-----------------------|---------------------|------------------|------------------------|------------|
|                                                                                                                        | Disease Severity Index       | Significance                                                                                                                                                                                                  |                                                             |                                                                                                                                          | External Validation | Analytical Validation | Clinical Validation | Clinical Utility |                        |            |
| Serum Lipocalin 2                                                                                                      | Sartorius Score              | R= 0.65<br>P < 0.001                                                                                                                                                                                          | Observational Case Control                                  | Correlation with Disease Severity                                                                                                        | N                   | N                     | N                   | N                | Low                    | Ref 98     |
| Serum Retinol binding protein 4 (RBP4)                                                                                 | HS PGA                       | R = 0.639<br>P < 0.0001                                                                                                                                                                                       | Observational Case Control                                  | Correlation with Disease Severity                                                                                                        | N                   | N                     | N                   | N                | Low                    | Ref 22     |
| Serum IL-17 (Stimulated PBMCs)                                                                                         | Hurley Stage                 | Heat-killed <i>Candida albicans</i> (HKCA)-Stimulation:<br>Hurley I and II vs. III:<br>P = 0.008<br><br>Heat-killed <i>Staphylococcus aureus</i> (HKSA)-Stimulation:<br>Hurley I and II vs. III:<br>P = 0.026 | Observational Case Control                                  | Decreased with Disease Severity                                                                                                          | N                   | N                     | N                   | N                | Low                    | Ref 47**   |
| Serum IL-10 (Stimulated PBMCs)                                                                                         | Hurley Stage                 | Heat-killed <i>Staphylococcus aureus</i> (HKSA)-Stimulation:<br>Hurley I and II vs. III:<br>P = 0.048                                                                                                         | Observational Case Control                                  | Decreased with Disease Severity                                                                                                          | N                   | N                     | N                   | N                | Low                    | Ref 47**   |
| Serum total monocytes (absolute count)                                                                                 | Hurley Stage                 | Hurley Stage I vs. III:<br>P = 0.026                                                                                                                                                                          | Observational Case Control                                  | Correlation with Disease Severity                                                                                                        | N                   | N                     | N                   | N                | Low                    | Ref 47     |
|                                                                                                                        | Sartorius Score              | R = 0.361<br>P = 0.003                                                                                                                                                                                        |                                                             |                                                                                                                                          |                     |                       |                     |                  |                        |            |
| Serum CD14 <sup>high</sup> /CD16 <sup>dim</sup> (absolute count)                                                       | Hurley Stage                 | Hurley Stage I vs. III:<br>P = 0.012<br><br>Hurley II vs. III:<br>P = 0.008                                                                                                                                   | Observational Case Control                                  | Correlation with Disease Severity                                                                                                        | N                   | N                     | N                   | N                | Low                    | Ref 47     |
| Serum IL-1B                                                                                                            | HS PGA                       | R = 0.28<br>P = 0.016                                                                                                                                                                                         | Observational Case Control                                  | Correlation with Disease Severity                                                                                                        | N                   | N                     | N                   | N                | Low                    | Ref 37     |
| Plasma YLK-40 /Chitinase 3                                                                                             | Hurley Stage                 | P < 0.001                                                                                                                                                                                                     | Observational Case Control                                  | Correlation with Disease Severity                                                                                                        | N                   | N                     | N                   | N                | Low                    | Ref 36     |
| Serum Hepsidin                                                                                                         | HS-PGA                       | P=0.03                                                                                                                                                                                                        | Observational Case Control                                  | Correlation with Disease Severity                                                                                                        | N                   | N                     | N                   | N                | Low                    | Ref 35     |
| Serum IL-2R                                                                                                            | Hurley Stage                 | Hurley I vs. II: P = 0.005<br><br>Hurley I vs. III: P < 0.0001<br><br>Hurley II vs. I: P = 0.005<br><br>Hurley II vs. III: P < 0.001<br><br>Hurley III vs. I: P < 0.0001<br><br>Hurley III vs. II: P < 0.001  | Observational Case Control                                  | Correlation with Disease Severity                                                                                                        | N                   | N                     | N                   | N                | Low                    | Ref 99     |
| WBC                                                                                                                    | Hurley Stage                 | Hurley I vs. II: P = 0.03                                                                                                                                                                                     | Observational Case Control                                  | Correlation with Disease Severity                                                                                                        | N                   | N                     | N                   | N                | Low                    | Ref 99     |
| Serum IL-6                                                                                                             | HS-PGA                       | R = 0.53<br>P < 0.001                                                                                                                                                                                         | Observational Case Control                                  | Correlation with Disease Severity                                                                                                        | N                   | N                     | N                   | N                | Low                    | Ref 37     |
|                                                                                                                        | Hurley Stage                 | Kruskal-Wallis:<br>P < 0.001                                                                                                                                                                                  |                                                             |                                                                                                                                          |                     |                       |                     |                  |                        |            |
| Serum IL-10                                                                                                            | HS-PGA                       | R = 0.34<br>P = 0.0034                                                                                                                                                                                        | Observational Case Control                                  | Correlation with Disease Severity                                                                                                        | N                   | N                     | N                   | N                | Low                    | Ref 37     |
| Serum IL-10 (Stimulated PBMCs)                                                                                         | Hurley Stage                 | Heat-killed <i>Staphylococcus aureus</i> (HKSA)-Stimulation:<br>Hurley I and II vs. III:<br>P = 0.026                                                                                                         | Observational Case Control                                  | Decreased with Disease Severity                                                                                                          | N                   | N                     | N                   | N                | Low                    | Ref 47     |
| Serum IL12p70                                                                                                          | HS-PGA                       | R = 0.30<br>P = 0.008                                                                                                                                                                                         | Observational Case Control                                  | Correlation with Disease Severity                                                                                                        | N                   | N                     | N                   | N                | Low                    | Ref 37     |
| Soluble TNF receptor II                                                                                                | HS-PGA                       | R = 0.4<br>P < 0.001                                                                                                                                                                                          | Observational Case Control                                  | Correlation with Disease Severity                                                                                                        | N                   | N                     | N                   | N                | Low                    | Ref 37     |
|                                                                                                                        | Hurley Stage                 | Kruskal-Wallis:<br>P = 0.001                                                                                                                                                                                  |                                                             |                                                                                                                                          |                     |                       |                     |                  |                        |            |
| Soluble TNF receptor I                                                                                                 | Hurley Stage                 | Kruskal-Wallis:<br>P < 0.001                                                                                                                                                                                  | Observational Case Control                                  | Correlation with Disease Severity                                                                                                        | N                   | N                     | N                   | N                | Low                    | Ref 37     |
| Serum TNF-a                                                                                                            | HS-PGA                       | One-Unit increase in TNF-a level: 9.74 times (CI 1.1-107.8) higher risk of severe disease (HS-PGA 4 or 5) vs. (HS-PGA 1 or 2)                                                                                 | Observational Case Control and ordinal regression modelling | Correlation with Disease Severity                                                                                                        | N                   | N                     | N                   | N                | Low                    | Ref 108    |
| Sonographic Hurley staging                                                                                             | Hurley Stage                 | Higher number of nodules found by clinical examination vs. sonographic:<br>P < 0.01<br><br>Higher number of abscesses found by sonographic vs. clinical examination:<br>P < 0.01                              | Observational Case Control                                  | 44.7% of patients with Hurley stage I as determined by clinical examination changed to a more severe stage after sonographic examination | N                   | N                     | N                   | N                | Low                    | Ref 61     |
| Sonographic Scoring of HS based on no. of fluid collections, no. of fistulous tracts and no. of affected localizations | Hurley Stage                 | Fleiss' kappa test: (K = 0.27; P = 0.02)                                                                                                                                                                      | Observational Case Control                                  | Correlation with Disease Severity                                                                                                        | N                   | N                     | N                   | N                | Low                    | Ref 60     |
| MRI Dilatation of dermal tunnels                                                                                       | Hurley Stage                 | Descriptive                                                                                                                                                                                                   | Descriptive                                                 | Correlation with Disease Severity                                                                                                        | N                   | N                     | N                   | N                | Low                    | Ref 109*** |
| Medical infrared thermography                                                                                          | Skin inflammation            | Descriptive                                                                                                                                                                                                   | Observational Case Control                                  | Correlation with skin inflammation                                                                                                       | N                   | N                     | N                   | N                | Low                    | Ref 110    |

|                                             |                                                  |                                                                                                                                                  |                                                |                                   |   |   |   |   |     |         |
|---------------------------------------------|--------------------------------------------------|--------------------------------------------------------------------------------------------------------------------------------------------------|------------------------------------------------|-----------------------------------|---|---|---|---|-----|---------|
| Echocardiography (epicardial fat thickness) | Hurley Stage                                     | R = 0.432<br>P = 0.001<br><br>For EFT ≥ 5.9 mm:<br>Hurley III vs. I and II:<br>OR = 1.876<br>P = 0.018                                           | Multivariate analysis and regression modelling | Correlation with Disease Severity | N | N | N | N | Low | Ref 111 |
| Serum MMP8                                  | mHSS                                             | R = 0.454<br>P = 0.039                                                                                                                           | Observational Case Control                     | Correlation with Disease Severity | N | N | N | N | Low | Ref 101 |
|                                             | Number of affected areas with inflammatory nodes | R = 0.514<br>P = 0.017                                                                                                                           |                                                |                                   |   |   |   |   |     |         |
|                                             | Number of areas with fistulas                    | R = 0.486<br>P = 0.026                                                                                                                           |                                                |                                   |   |   |   |   |     |         |
| Serum ASCA (IgG and IgA)                    | Hurley Stage                                     | P < 0.001<br><br>For Hurley III: OR = 3.54<br>P = 0.003                                                                                          | Univariate and Multivariate analysis           | Correlation with Disease Severity | N | N | N | N | Low | Ref 100 |
| Serum Neutrophil Count                      | Hurley Stage                                     | Kruskal-Wallis: P = 0.002                                                                                                                        | Multivariate analysis and regression modelling | Correlation with Disease Severity | N | N | N | N | Low | Ref 67  |
|                                             | mHSS                                             | R = 0.33<br>P = 0.0009                                                                                                                           |                                                |                                   |   |   |   |   |     |         |
| Smoking pack-years                          | Hurley Stage                                     | Hurley III and II vs. I:<br>OR = 1.02<br>P = 0.001                                                                                               | Multivariate analysis and regression modelling | Correlation with Disease Severity | N | N | N | N | Low | Ref 16  |
| Disease duration                            | Hurley Stage                                     | Hurley III and II vs. I:<br>OR = 1.03<br>P < 0.001                                                                                               | Multivariate analysis and regression modelling | Correlation with Disease Severity | N | N | N | N | Low | Ref 16  |
| Localization                                | Hurley Stage                                     | Hurley III and II vs. I:<br>Axillary<br>OR = 2.24<br>P < 0.001<br><br>perianal<br>OR = 1.92<br>P < 0.001<br><br>Mammary<br>OR = 1.48<br>P = 0.03 |                                                |                                   |   |   |   |   |     |         |
| Tissue Citrullinated H3 Protein             | Hurley Stage                                     | R = 0.75<br>P < 0.0001                                                                                                                           | Observational Case Control                     | Correlation with Disease Severity | N | N | N | N | Low | Ref 64  |

Legend: \*\*This study involved stimulation of PBMCs compared to other observational studies.

\*\*\* Case Report only

**eTable 5: Predictive Biomarkers**

| Biomarker                             | Response to Therapy |                                | Type of Study                                                                                | Interpretation                                                                                 | Critical Evaluation |                       |                     |                  | GRADE Evidence Profile | Reference |
|---------------------------------------|---------------------|--------------------------------|----------------------------------------------------------------------------------------------|------------------------------------------------------------------------------------------------|---------------------|-----------------------|---------------------|------------------|------------------------|-----------|
|                                       | Treatment           | Outcome Measure (Significance) |                                                                                              |                                                                                                | External Validation | Analytical Validation | Clinical Validation | Clinical Utility |                        |           |
| Serum CRP                             | Infliximab          | PGA (P=0.0112)                 | Multivariate analysis and regression modelling<br>Prospective pilot                          | Higher levels of CRP correlate with lower response to infliximab                               | N                   | N                     | N                   | N                | Low                    | Ref 75    |
|                                       | Adalimumab          | mHSS (P=0.04)                  |                                                                                              |                                                                                                |                     |                       |                     |                  |                        | Ref 38    |
| Serum IL-6                            | Infliximab          | PGA (p=0.02064)                | Multivariate analysis and regression modelling<br>Prospective pilot                          | Higher IL-6 correlate to lower response to infliximab                                          | N                   | N                     | N                   | N                | Low                    | Ref 75    |
|                                       | Adalimumab          | mHSS (p=0.003)                 |                                                                                              |                                                                                                |                     |                       |                     |                  |                        | Ref 38    |
| Serum IL-1B                           | Etanercept          | mHSS (p=0.022)                 | Multivariate analysis and regression modelling<br>Case Control                               | Clinical Improvement correlated with increased IL-1B                                           | N                   | N                     | N                   | N                | Low                    | Ref 47    |
| Serum IL-17                           | Etanercept          | mHSS (p=0.022)                 | Multivariate analysis and regression modelling<br>Case Control                               | Clinical Improvement correlated with increased IL17                                            | N                   | N                     | N                   | N                | Low                    | Ref 47    |
| Serum IL-8                            | Adalimumab          | mHSS (R=0.52) (P=0.024)        | Regression Analysis<br>Case Control                                                          | Decreasing IL-8 correlated with treatment response                                             | N                   | N                     | N                   | N                | Low                    | Ref 38    |
| sTNF-RI                               | Adalimumab          | mHSS (R=0.55) (p=0.015)        | Linear Correlations                                                                          |                                                                                                | N                   | N                     | N                   | N                | Low                    | Ref 38    |
| Serum Anti-Adalimumab antibody Level; | Adalimumab          | HISCR (P=0.0006)               | Multivariate analysis and regression modelling<br>Retrospective case series (no control arm) | Correlation between serum adalimumab levels, anti-adalimumab antibodies and clinical response. | N                   | N                     | N                   | N                | Low                    | Ref 112   |
| Tissue Cell Counts CXCL6              | Adalimumab          | R vs NR (P=0.046)              | Multivariate analysis and regression modelling<br>Observational Mechanistic Study            | Higher tissue cell counts associated with non-responders to Adalimumab therapy                 | N                   | N                     | N                   | N                | Low                    | Ref 65    |
| Tissue Cell Counts CXCR1              | Adalimumab          | R vs NR (p=0.009)              |                                                                                              |                                                                                                |                     |                       |                     |                  |                        |           |
| Tissue Cell Counts IL-1a              | Adalimumab          | R vs NR (p=0.0009)             |                                                                                              |                                                                                                |                     |                       |                     |                  |                        |           |
| Tissue Cell Counts CCL 17             | Adalimumab          | R vs NR (p=0.027)              |                                                                                              |                                                                                                |                     |                       |                     |                  |                        |           |
| Tissue Cell Counts CCR7               | Adalimumab          | R vs NR (p=0.004)              |                                                                                              |                                                                                                |                     |                       |                     |                  |                        |           |
| Tissue Cell Counts CXCR4              | Adalimumab          | R vs NR (p=0.01)               |                                                                                              |                                                                                                |                     |                       |                     |                  |                        |           |
| TISSUE Cell Counts CD19               | Adalimumab          | R vs NR (p=0.003)              |                                                                                              |                                                                                                |                     |                       |                     |                  |                        |           |
| Tissue Cell Counts CXCR5              | Adalimumab          | R vs NR (p=0.008)              |                                                                                              |                                                                                                |                     |                       |                     |                  |                        |           |
| Tissue Cell Counts BAFF               | Adalimumab          | R vs NR (p=0.005)              |                                                                                              |                                                                                                |                     |                       |                     |                  |                        |           |
|                                       |                     |                                |                                                                                              |                                                                                                |                     |                       |                     |                  |                        |           |

**eTable 6: Limitations and Proposed Future Directions of Biomarker Research in HS**

| Limitation(s)                                                                                     | Proposed Solution(s)                                                                                                                  |
|---------------------------------------------------------------------------------------------------|---------------------------------------------------------------------------------------------------------------------------------------|
| Lack of Independent Validation of HS Biomarkers                                                   | Biomarker-Specific, Multicentre, Independent Validation Studies                                                                       |
| Biomarker Identification Based on Pre-selected targets only                                       | Assumption-Free 'omics' biomarker feature selection studies and methodologies                                                         |
| Lack of co-linearity assessments in existing range of biomarkers                                  | Directed assessment of co-linearity in currently identified biomarkers<br>Identify HS-specific biomarkers in assumption-free datasets |
| Deficiencies in existing Clinical Outcomes for validation of monitoring and predictive biomarkers | Development of Validated, Reliable Clinical Outcome Measures<br>Development of Treat-to-target outcome measures                       |
| Need for biomarker integration into clinical trials                                               | Involvement of stakeholders in development in priorities and goals for biomarker development in HS                                    |
| High variability in biopsy techniques and definitions                                             | International Consensus Agreement on Biopsy sites and techniques                                                                      |

## **eReferences**

1. Goldberg SR, Strober BE, Payette MJ. Hidradenitis suppurativa: Epidemiology, clinical presentation, and pathogenesis. *J Am Acad Dermatol*. 2020 May;82(5):1045-1058.
2. Sabat R, Jemec GBE, Matusiak L, Kimball AB, Prens E Wolk K Hidradenitis Suppurativa *Nat Rev Dis Prim* 2020; 6:18
3. Kohorst JJ, Kimball AB, Davis MD. Systemic associations of hidradenitis suppurativa. *J Am Acad Dermatol*. 2015 Nov;73(5 Suppl 1):S27-35.
4. Frew JW, Marzano AV, Wolk K, Join-Lambert O, Alavi A, Lowes MA, Piguet V. A Systematic Review of Promising Therapeutic Targets in Hidradenitis Suppurativa: A Critical Evaluation of Mechanistic and Clinical Relevance. *J Invest Dermatol* 2021;141(2):316-324.e2
5. Byrd AS, Dina Y, Okoh UJ, Quartey QQ, Carmona-Rivera C, Williams DW et al Specimen Collection for translational studies in Hidradenitis Suppurativa. *Sci Rep* 2019;9:12207
6. Amur A. Biomarker Terminology: speaking the same language. United States Food and Drug Administration. [cited 10/12/2020] Available from: <https://www.fda.gov/files/BIOMARKER-TERMINOLOGY--SPEAKING-THE-SAME-LANGUAGE.pdf>
7. Biomarker. European Medicines Agency. [cited 10/12/2020/. Available from: <https://www.ema.europa.eu/en/glossary/biomarker#:~:text=A%20biological%20molecule%20found%20in,European%20Medicines%20Agency>
8. Renert-Yuval Y, Thyssen JP, Bissonnette R, Bieber T, Kabashima K, Hijnen D, Guttman-Yassky E, Biomarkers in atopic dermatitis - a review on behalf of the international eczema council, *Journal of Allergy and Clinical Immunology* (2021), doi: <https://doi.org/10.1016/j.jaci.2021.01.013>.
9. Guyatt G, Oxman AD, Sultan S, Brozek J, Glasziou P, Alonso-Coello P, et al. GRADE guidelines: 11. Making an overall rating of confidence in effect estimates for a single outcome and for all outcomes. *Journal of clinical epidemiology*. 2013;66(2):151-7.

10. Radhakrishna U, Vishweswaraiah S, Ratnamala U, Bahado-Singh R, Saiyed N DNA Methylation and microRNA biomarkers for non-invasive detection of hidradenitis suppurativa. *Exp Dermatol* 2019; 8<sup>th</sup> European Hidradenitis Suppurativa Foundation Conference. EHSF 2019. Poland. 29(S2):6-7
11. Hessam, S., M. Sand, M. Skrygan, T. Gambichler, and F. G. Bechara. 2017. 'Expression of MiRNA-155, MiRNA-223, MiRNA-31, MiRNA-21, MiRNA-125b, and MiRNA-146a in the Inflammatory Pathway of Hidradenitis Suppurativa'. *Inflammation* 40 (2): 464–72. <https://doi.org/10.1007/s10753-016-0492-2>.
12. Akdogan, Neslihan, Nuran Alli, Pinar Incel Uysal, Canan Topcuoglu, Tuba Candar, and Turan Turhan. 2018. 'Visfatin and Insulin Levels and Cigarette Smoking Are Independent Risk Factors for Hidradenitis Suppurativa: A Case-Control Study'. *Archives of Dermatological Research* 310 (10): 785–93. <https://doi.org/10.1007/s00403-018-1867-z>.
13. Vilanova I, Hernandez JL, Mata C, Duran C, Garcia-Unzueta MT, Portilla V Insulin resistance in hidradenitis suppurativa: A Case-control study. *J Eur Acad Dermatol Venereol* 2018;32(5):820-824
14. Garg A, Papagermanos V, Midura M, Strunk Incidence of hidradenitis suppurartiva among tobacco smokers. A population-based retrospective analysis in the U.S.A. *Br J Dermatol* 2018;178(3): 709-714
15. van Straalen KR, Prens EP, Willemsen G, Boomsma DI, van der Zee HH. Contribution of Genetics to the Susceptibility to Hidradenitis Suppurativa in a Large, Cross-sectional Dutch Twin Cohort. *JAMA Dermatol*. 2020;156(12):1359–1362.
16. Schraeder AMR, Deckers IE, van der Zee HH, Boer J Prens EP. Hidradenitis Suppurativa: A retrospective analysis of 846 Dutch patients to identify factors associated with disease severity. *J Am Acad Dermatol* 2014;71(3):460-7



17. Molina-Leyva A, Cuenca-Barrales. Adolescent-Onset Hidradenitis Suppurativa: Prevalence, risk factors and disease features. *Dermatology* 2019;235(1):45-50
18. Frew JW, Vekic DA, Woods J, Cains GD A systematic review and critical evaluation of reported sequence variants in hidradenitis suppurativa. *Br J Dermatol* 2017;177(4):987-998
19. Frew J, AH, O'Brien EA, Litvinov IV, Alavi A, Netchiporouk E Hidradenitis Suppurativa: Comprehensive Review of Predisposing Genetic Mutations and Changes *J Cutan Med Surg* 2019;23(5):619-527
20. Duchalet S, Miskinyte S, Delage M, Ungeheuer MN, Lam T, Benhadou F et al Low prevalence of GSC mutations in a large cohort of predominantly Caucasian patients with hidradenitis suppurativa. *J Invest Dermatol* 2020; 140(10):2085-208.e14
21. Frew JW Differential profiles of gamma secretase-notch signaling in Hidradenitis Suppurativa: The Need for Genotype-Endotype-Phenotype Analysis. *Br J Dermatol* 2021; doi:10.1111/bjd.19805
22. González-López, MA., Ocejo-Viñals JG, Mata C, Vilanova I, Guiral S, Virginia Portilla, Ricardo Blanco, and José L. Hernández. 2020. 'Association of Retinol Binding Protein4 (RBP4) and Ghrelin Plasma Levels with Insulin Resistance and Disease Severity in Non-Diabetic Patients with Hidradenitis Suppurativa'. *Experimental Dermatology*, June. <https://doi.org/10.1111/exd.14132>.
23. Ocejo-Vinyals JG, Irure-Ventura J, Guiterrez-Larranaga M et al Association of TLR Polymorphisms with susceptibility to Hidradenitis Suppurativa in a Spanish Caucasian population. 34th European Immunogenetics and Histocompatibility and 31st British Society for Histocompatibility and Immunogenetics Conference. United Kingdom. 95 (4):410-411
24. Jørgensen AR Aarestrup J, Baker JL, Thomsen SF Association of Birth Weight, Childhood Body Mass Index and Height with risk of Hidradenitis Suppurativa. *JAMA Dermatol.* 2020;156(7):746-753

25. Kjærsgaard Ansdersen R, Jorgensen IF, Reguant R, Jemec GBE et al Disease Trajectories for Hidradenitis Suppurativa in the Danish Population. *JAMA Dermatol.* 2020;156(7):780-786
26. Althubaiti Informaiton bias in health research: definition, pitfalls and adjustment methods. *J Multidiscip Healthc* 2016;9:211-217
27. Zouboulis CC, Del Marmol V, Mrowietz U, Prens EP, Tzellos T, Jemec GB. Hidradenitis Suppurativa/Acne Inversa: Criteria for Diagnosis, Severity Assessment, Classification and Disease Evaluation. *Dermatology.* 2015;231(2):184-90.
28. Revuz JE, Jemec GBE Diagnosing Hidradenitis Suppurativa. *Dermatologic Clinics* 2016;34(1):1-5
29. Argyropoulou M, Grundhuber M, Kanni T, Tzanetakou V et al A composite biomarker score for the diagnosis of hidradenitis suppurativa. 8<sup>th</sup> EHSF 2019
30. Kelly, G., R. Hughes, T. McGarry, M. van den Born, K. Adamzik, R. Fitzgerald, C. Lawlor, A. M. Tobin, C. M. Sweeney, and B. Kirby. 2015. 'Dysregulated Cytokine Expression in Lesional and Nonlesional Skin in Hidradenitis Suppurativa'. *British Journal of Dermatology* 173 (6): 1431–39. <https://doi.org/10.1111/bjd.14075>.
31. Wolk, Kerstin, Katarzyna Warszawska, Conny Hoeflich, Ellen Witte, Sylke Schneider-Burrus, Katrin Witte, Stefanie Kunz, et al. 2011. 'Deficiency of IL-22 Contributes to a Chronic Inflammatory Disease: Pathogenetic Mechanisms in Acne Inversa'. *Journal of Immunology (Baltimore, Md.: 1950)* 186 (2): 1228–39. <https://doi.org/10.4049/jimmunol.0903907>.
32. Hessam S, Scholl S, Sand M, Schmitz L et al A Novel Severity Assessment Scoring System for Hidradenitis Suppurativa. *JAMA Dermatol* 2018;154(3):330-335. doi: 10.1001/jamadermatol.2017.5890
33. Witte-Händel, Ellen, Kerstin Wolk, Athanasia Tsaousi, Marie Luise Irmer, Rotraut Mößner, Orr Shomroni, Thomas Lingner, et al. 2019. 'The IL-1 Pathway Is Hyperactive

in Hidradenitis Suppurativa and Contributes to Skin Infiltration and Destruction'. *Journal of Investigative Dermatology* 139 (6): 1294–1305.

<https://doi.org/10.1016/j.jid.2018.11.018>.

34. Ponikowska, Malgorzata, Lukasz Matusiak, Monika Kasztura, Ewa A. Jankowska, and Jacek C. Szepietowski. 2020. 'Deranged Iron Status Evidenced by Iron Deficiency Characterizes Patients with Hidradenitis Suppurativa'. *Dermatology (Basel, Switzerland)* 236 (1): 52–58. <https://doi.org/10.1159/000505184>.
35. Ghias M, Cameron S, Shaw F, Soliman Y, Kutner A, Chaitowitz M et al. Anemia in Hidradenitis Suppurativa, Hcpidin as a Diagnostic Tool *Am J Clin Pathol* 2019;152(S1):S15
36. Matusiak, Łukasz, Joanna Salomon, Danuta Nowicka-Suszko, Andrzej Bieniek, and Jacek C. Szepietowski. 2015. 'Chitinase-3-like Protein 1 (YKL-40): Novel Biomarker of Hidradenitis Suppurativa Disease Activity?' *Acta Dermato-Venereologica* 95 (6): 736–37. <https://doi.org/10.2340/00015555-2061>.
37. Jiménez-Gallo D, de la Varga-Martínez R, Ossorio-García L, *et al.*: The Clinical Significance of Increased Serum Proinflammatory Cytokines, C-Reactive Protein, and Erythrocyte Sedimentation Rate in Patients with Hidradenitis Suppurativa. *Mediators Inflamm.* 2017; 2017: 2450401.
38. Jiménez-Gallo D, de la Varga-Martínez R, Ossorio-García L, *et al.*: Effects of adalimumab on T-helper-17 lymphocyte- and neutrophil-related inflammatory serum markers in patients with moderate-to-severe hidradenitis suppurativa. *Cytokine.* 2018; 103: 20–24.
39. Batycka-Baran, Aleksandra, Wojciech Baran, Danuta Nowicka-Suszko, Maria Koziol-Gańczyńska, Andrzej Bieniek, Łukasz Matusiak, Łukasz Łaczmański, and Jacek Cezary Szepietowski. 2020. 'Serum Concentration and Skin Expression of S100A7 (Psoriasin) in

Patients Suffering from Hidradenitis Suppurativa'. *Dermatology*, November, 1–7.  
<https://doi.org/10.1159/000510689>.

40. Hotz C, Boniotto M, Guguin A, *et al.*: Intrinsic Defect in Keratinocyte Function Leads to Inflammation in Hidradenitis Suppurativa. *J Invest Dermatol*. 2016; 136(9): 1768–1780.
41. Emelianov VU, Bechara FG, Gläser R, *et al.*: Immunohistological pointers to a possible role for excessive cathelicidin (LL-37) expression by apocrine sweat glands in the pathogenesis of hidradenitis suppurativa/acne inversa. *Br J Dermatol*. 2012; 166(5): 1023–1034.
42. Lima AL, Karl I, Giner T, *et al.*: Keratinocytes and neutrophils are important sources of proinflammatory molecules in hidradenitis suppurativa. *Br J Dermatol*. 2016; 174(3): 514–521.
43. Eşer, Emel, Burhan Engin, Pelin Yüksel, Bekir Sami Kocazeybek, Zekayi Kutlubay, Server Serdaroğlu, and Özge Aşkın. 2020. 'Relationship between Fecal Calprotectin Level and Disease Activity in Patients with Hidradenitis Suppurativa'. *Dermatologic Therapy* 33 (2): e13232. <https://doi.org/10.1111/dth.13232>.
44. Lloyd-McLennan, Allison M., Sabina Ali, and Nicole W. Kittler. n.d. 'Prevalence of Inflammatory Bowel Disease among Pediatric Patients with Hidradenitis Suppurativa and the Potential Role of Screening with Fecal Calprotectin'. *Pediatric Dermatology* n/a (n/a). Accessed 19 February 2021. <https://doi.org/10.1111/pde.14417>.
45. Akdogan, Neslihan, Sibel Dogan, Pinar Incel-Uysal, Erdem Karabulut, Canan Topcuoglu, Basak Yalcin, and Nilgun Atakan. 2020. 'Serum Amyloid A and C-Reactive Protein Levels and Erythrocyte Sedimentation Rate Are Important Indicators in Hidradenitis Suppurativa'. *Archives of Dermatological Research* 312 (4): 255–62. <https://doi.org/10.1007/s00403-019-02014-8>.
46. Matusiak, Łukasz, Justyna Szczęch, Andrzej Bieniek, Danuta Nowicka-Suszko, and Jacek C. Szepietowski. 2017. 'Increased Interleukin (IL)-17 Serum Levels in Patients with Hidradenitis Suppurativa: Implications for Treatment with Anti-IL-17 Agents'.

*Journal of the American Academy of Dermatology* 76 (4): 670–75.

<https://doi.org/10.1016/j.jaad.2016.10.042>.

47. Kanni T, Tzanetakou V, Savva A, *et al.*: Compartmentalized Cytokine Responses in Hidradenitis Suppurativa. *PLoS One*. 2015; 10(6): e0130522.
48. Thomi R, Schlapbach C, Yawalkar N, *et al.*: Elevated levels of the antimicrobial peptide LL-37 in hidradenitis suppurativa are associated with a Th1/Th17 immune response. *Exp Dermatol*. 2018; 27(2): 172–177.
49. Ten Oever J, van de Veerdonk FL, Joosten LA, *et al.*: Cytokine Production Assays Reveal Discriminatory Immune Defects in Adults with Recurrent Infections and Noninfectious Inflammation. *Clin Vacc Immunol*. 2014; 21(8): 1061–1069.
50. Ring HC, Thorsen J, Saunte DM, Lilje B, Bay L *et al.* The follicular skin microbiome in patients with Hidradenitis Suppurativa and Healthy Controls. *JAMA Derm* 2017;153(9):897-905
51. Guet Revillet H, Jais JP, Ungeheuer MN, Coignard-Biehler H, Duchatelet S *et al* The Microbiological landscape of anaerobic infections in hidradenitis suppurativa: A prospective metagenomic study *Clin Infect Dis* 2017;65(2):282-291
52. Naik HB, Nassif A, Ramesh MS, Schultz G *et al* Are Bacteria infectious pathogens in Hidradenitis Suppurativa? Debate at the Symposium for Hidradenitis Suppurativa Advances Meeting. *J Invest Dermatol* 2019;139(1):13-16
53. Ring HC, Sigsgaard V, Thorsen J, Fuursted K, Fabricus S, Saunte DM, Jemec GBE The microbiome of tunnels in hidradenitis suppurativa patients. *J Eur Acad Dermatol Venereol* 2019;33(9):1775-1780
54. Schneider AM, Cook LC, Zhan X, Banerjee K, Cong Z *et al* Loss of Skin Microbial Diversity in Alteration of Bacterial Metabolic Functions in Hidradenitis Suppurativa. *J Invest Dermatol* 2020;140(3):716-720

55. Van der zee HH, de Ruiter L, van den Broecke DG, Dik WA, Laman JD, Prens EP Elevated levels of tumour necrosis factor (TNF)- $\alpha$ , interleukin (IL) 1 $\beta$  and IL-10 in Hidradenitis Suppurativa Skin: A rationale for targeting TNF- $\alpha$  and IL-1 $\beta$ . *Br J Dermatol* 2011; 164(6):1292-1298
56. Navrazhina K, Frew JW, Krueger JG Interleukin 17C is elevated in lesional tissue of hidradenitis suppurativa. *Br J Dermatol* 2020;182(4):1045-1047
57. van der Zee HH, Laman JD, de Ruiter L, *et al.*: Adalimumab (antitumour necrosis factor- $\alpha$ ) treatment of hidradenitis suppurativa ameliorates skin inflammation: an *in situ* and *ex vivo* study. *Br J Dermatol.* 2012; 166(2): 298–305.
58. Grand D, Navrazhina K, Frew JW A Scoping review of non-invasive imaging modalities in Dermatological Disease: Potential Novel Biomarkers for Hidradenitis Suppurativa. *Front Med (Lausanne)* 2019;6:253.
59. Grand D, Frew JW, Navrazhina K, Krueger JG Doppler ultrasound-based noninvasive biomarkers in hidradenitis suppurativa: evaluation of analytical and clinical validity. *Br J Dermatol* 2020 doi:10.1111/bjd.19343
60. Wortsman X, Moreno C, Soto R, Arellano J, Pezo C, Worstman J Ultrasound in depth characterization and staging of hidradenitis suppurativa. *Dermatol Surg* 2013;39(12):1835-1842
61. Martorell A, Alfageme Roldan F, Vilarrasa Rull E, Ruiz-Villaverde R, Romani de Gabriel J *et al* Ultrasound as a diagnostic and management tool in hidradenitis suppurativa patients: a multicentre study. *J Eur Acad Dermatol Venereol* 2019;33(11);2137-2142
62. Nazzaro G, Passoni E, Calzari P, Barbareschi M, Muratori S, Veraldi S, Marzano AV Color Doppler as a tool for correlating vascularisation and pain in Hidradenitis Suppurativa lesions. *Skin Res Technol* 2019;25(6):830-834

63. Caposiena Caro RD, Solivetti FM, Bianchi L Power doppler ultrasound assessment of vascularization in hidradenitis suppurativa lesions. *J Eur Acad Dermatol Venereol* 2018;32(8):1360-1367
64. Byrd AS, Carmona-Rivera C, O'Neil LJ, Carlucci PM et al Neutrophil extracellular traps, B cells and type I interferons contribute to immune dysregulation in hidradenitis suppurativa. *Sci Trans Med* 2019;11(508):eaav5908
65. Lowe MM, Naik HB, Clancy S, Pauli M, Smith KM, Bi Y, Dunstan R, Gudjonsson JE et al Immunopathogenesis of hidradenitis suppurativa nad erezponse to anti-TNF-alpha therapy. *JCI Insight* 2020;5(19):e139932
66. Theut Riis P, Saunte DM, Benhadou F, Del Marmol V, Guillen P et al Low and High body mass index in hidradenitis suppurativa patients- different subtypes? *J Eur Acad Dermatol Venereol* 2017;32(2):307-312
67. Hessam S, Sand M, Gambichler, Bechara FG Correlation of Serum Inflammatory with disease severity in patients with Hidradenitis Suppurativa. et al *J Am Acad Dermatol.* 2015;73(6):998-1005
68. Frew JW, Jiang CS, Singh N, Navrazhina K, Vaughan R, Krueger JG Quantifying the natural variation in lesion counts over time in untreated Hidradenitis Suppurativa: Implications for outcome measures and trial design. *JAAD Int* 2020;1(2): 208-221
69. Roy C, Roy SF Ghazawi FM et al. Cutaneous squamous cell carcinoma arising in hidradenitis suppurativa: A case report. *SAGE Open Med Case Reports* 2019;7:2050313X19847359
70. Lapins J, Ye W, Nyren O, Emtestam L Incidence of cancer among patients with hidradenitis suppurativa *Arch Dermatol* 2001;137(6):730-4
71. Frew JW, Jiang CS, Singh N Grand D et al Malignancy and Infection Risk during adalimumab therapy in hidradenitis suppurativa. *Clin Exp Dermatol* 2020;45(7):859-865

72. Liu M, Degner J, Georgantas RW, Nader A, Mostafa NM, Teixeira HD et al A genetic variant in the BCL2 Gene associated with Adalimumab response in Hidradenitis Suppurativa Clinical Trials and Regulated Expression of BCL2. *J Invest Dermatol* 2020;140(3):574-582.e2
73. Frew JW, Jiang CS, Singh N et al. Clinical response rates, placebo response rates, and significantly associated covariates are dependent on choice of outcome measure in hidradenitis suppurativa: A post hoc analysis of PIONEER 1 and 2 individual patient data. *J Am Acad Dermatol*. 2020 May;82(5):1150-1157.
74. Frew JW, Jiang CS, Singh N, Grand D, Navrazhina K, Vaughan R, Krueger JG Dermal Tunnels influence time to clinical response and family history influences time to loss of clinical response in patients with hidradenitis suppurativa treated with adalimumab. *Clin Exp Dermatol* 2021;46(2):306-313
75. Montaudié H, Seitz-Polski B, Cornille A, Benzaken S, Lacour JP, Passeron T et al Interleukin 6 and high-sensitivity C-reactive protein are potential predictive markers of response to infliximab in hidradenitis suppurativa. *J Am Acad Dermatol* 2017;76(1):156-158
76. Gudjonsson JE, Tsoi LC, Ma F, Billi AC, van Straalen KR, Vossen ARJV et al Contribution of plasma cells and B cells to hidradenitis suppurativa pathogenesis. *JCI Insight* 2020;5(19):e139930
77. Kimball AB, Okun MM, Williams DA et al. Two Phase 3 Trials of Adalimumab for Hidradenitis Suppurativa. *N Engl J Med*. 2016 Aug 4;375(5):422-34.
78. Zouboulis CC, Okun MM, Prens EP et al. Long-term adalimumab efficacy in patients with moderate-to-severe hidradenitis suppurativa/acne inversa: 3-year results of a phase 3 open-label extension study. *J Am Acad Dermatol*. 2019 Jan;80(1):60-69.e2.
79. Torres R, Judson-Torres RL. Research Techniques Made Simple: Feature Selection for Biomarker Discovery. *J Invest Dermatol*. 2019 Oct;139(10):2068-2074.e1.
80. Frew JW Hidradenitis Suppurativa is an autoinflammatory keratinisation disease: A review of the clinical histological and molecular evidence. *JAAD Int*. 2020; 1(1): 62-72.



81. Hessam S, Gambichler T, Skrygan M et al. Increased expression profile of NCSTN, Notch and PI3K/AKT3 in hidradenitis suppurativa. *J Eur Acad Dermatol Venereol*. 2020 Sep 25.
82. Xiao X, He Y, Li C, Zhang X, Xu H, Wang B. Nicastrin mutations in familial acne inversa impact keratinocyte proliferation and differentiation through the Notch and phosphoinositide 3-kinase/AKT signalling pathways. *Br J Dermatol*. 2016 Mar;174(3):522-32.
83. Frew JW Differential profiles of gamma secretase-Notch signalling in Hidradenitis Suppurativa: The need for Genotype-Endotype-Phenotype Analysis. *Br J Dermatol* 2021; doi:10.1111/bjd.19805
84. Zouboulis CC, Tzellos T, Kyrgidis A et al. Development and validation of the International Hidradenitis Suppurativa Severity Score System (IHS4), a novel dynamic scoring system to assess HS severity. *Br J Dermatol*. 2017 Nov;177(5):1401-1409.
85. Goldfarb N, Lowes MA, Butt M, King T, Alavi A, Kirby JS. Hidradenitis Suppurativa Area and Severity Index Revised (HASI-R): psychometric property assessment. *Br J Dermatol*. 2020 Sep 23.
86. Navrazhina K, Frew JW, Gilleaudeau P, Sullivan-Whelan M, Garcet S, Krueger JG Epithelialized tunnels are a source of inflammation in Hidradenitis Suppurativa. *J Allerg Clin Immunol* 2021; doi:10.1016/j.jaci.2020.12.651
87. Navrazhina K, Garcet S, Gonzales J, Grand D, Frew JW, Krueger JG In Depth Analysis of the Hidradenitis Suppurativa Serum Proteome Identified Distinct Inflammatory Profiles. *J Invest Dermatol* 2021 (In Press)
88. Martorell A, Jfir A et al Defining hidradenitis suppurativa phenotypes based on the elementary lesion pattern: results of a prospective study. *JEADV* 2020;34(6):1309-1318
89. Sartorius K, Lapins J, Emtestam L, Jemec GB. Suggestions for uniform outcome variables when reporting treatment effects in hidradenitis suppurativa. *Br J Dermatol*. 2003;149(1):211-213

90. Jenei A, Medgyesi B, Gaspar K, Beke G, Kinyo A et al Apocrine gland rich skin has a non-inflammatory IL-17 Related Immune Mileu, that turns to inflammatory IL-17 Mediated Disease in Hidradenitis Suppurativa. *J Invest Dermatol* 2019;139(4):964-968
91. Beke G, Dajnoki Z, Kapitany A, Gaspar K, et al Immunotopographical differences in human skin. *Front Immunol* 2018;9:424
92. Frew JW, Navrazhina K Byrd AS, Garg A, Ingram JR et al Defining, Lesional, Perilesional and Unaffected skin I Hidradenitis Suppurativa: proposed recommendations for clinical trials and translational research studies. *Br J Dermatol* 2019;181(6):1339-1341
93. Torres R, Judson-Torres RL Research Techniques Made Simple: Feature Selection for Biomarker Discovery. *J Invest Dermatol* 2019;139(10):2068-2074
94. Giamarellos-Bouboulis EJ, Argyropoulou M, Kanni T, Spyridopoulos T, Otto I et al Clinical Efficacy of complement C5a inhibition by IFX-1 in hidradenitis suppurativa: an open-label single arm trial in patients not eligible for adalimumab. *Br J Dermatol* 2020; 183(1):176-178
95. Chemocentryx “ChemoCentryx Announces Positive Topline Results of Phase II AURORA Clinical Trial of Avacopan in the Treatment of Hidradenitis Suppurativa (HS)” Retrieved 1<sup>st</sup> March 2021 <https://ir.chemocentryx.com/news-releases/news-release-details/chemocentryx-announces-positive-topline-results-phase-ii-aurora>
96. Gonzales-Lopez GA, Vilanova I, Ocejo-Vinals G, Arlegui et al Circulating levels of Adiponectin, leptin resistin and visfatin in non-diabetic patients with hidradenitis suppurativs. *Arch Dermatol Res* 2020;312,595-600
97. Ozkur E, Erdem Y, Altunay IK, Demir D, Dolu NC, Serin E, Cerman AA Serum irisin level, insulin resistance and lipid profiles in patients with hidradenitis suppurativa: a case control study. *An Bras Derm* 2020;95(6):708-713
98. Wolk K, Wenzel J, Tsaousi A, Witte-Händel E, Babel N, Zelenak C, Volk HD, Sterry W, Schneider-Burrus S, Sabat R. Lipocalin-2 is expressed by activated granulocytes and keratinocytes in affected skin and reflects disease activity in acne inversa/hidradenitis

- suppurativa. *Br J Dermatol*. 2017 Nov;177(5):1385-1393. doi: 10.1111/bjd.15424. Epub 2017 Sep 19. PMID: 28256718.
99. Matusiak Ł, Bieniek A, Szepietowski JC. Soluble interleukin-2 receptor serum level is a useful marker of hidradenitis suppurativa clinical staging. *Biomarkers*. 2009 Sep;14(6):432-7. doi: 10.1080/13547500903075218. PMID: 19627253.
100. Assan F, Gottlieb J, Tubach F et al. Anti-Saccharomyces cerevisiae IgG and IgA antibodies are associated with systemic inflammation and advanced disease in hidradenitis suppurativa. *J Allergy Clin Immunol*. 2020 Aug;146(2):452-455.e5. doi: 10.1016/j.jaci.2020.01.045. Epub 2020 Feb 13. PMID: 32061710.
101. Tsaousi A, Witte E, Witte K et al. MMP8 Is Increased in Lesions and Blood of Acne Inversa Patients: A Potential Link to Skin Destruction and Metabolic Alterations. *Mediators Inflamm*. 2016;2016:4097574. doi: 10.1155/2016/4097574. Epub 2016 Oct 23. PMID: 27843200; PMCID: PMC5097814.
102. Derruau S, Gobinet C, Untereiner V et al. New insights into hidradenitis suppurativa diagnosis via salivary infrared biosignatures: A pilot study. *J Biophotonics*. 2021 Mar;14(3):e202000327. doi: 10.1002/jbio.202000327. Epub 2020 Dec 2. PMID: 33231348.
103. Miller IM, Rytgaard H, Mogensen UB et al. Body composition and basal metabolic rate in Hidradenitis Suppurativa: a Danish population-based and hospital-based cross-sectional study. *J Eur Acad Dermatol Venereol*. 2016 Jun;30(6):980-8. doi: 10.1111/jdv.13522. Epub 2015 Dec 9. PMID: 26660945.
104. Hessam S, Gambichler T, Höxtermann S et al. Frequency of circulating subpopulations of T-regulatory cells in patients with hidradenitis suppurativa. *J Eur Acad Dermatol Venereol*. 2020 Apr;34(4):834-838. doi: 10.1111/jdv.16071. Epub 2019 Dec 9. PMID: 31721309.
105. Wieland CW, Vogl T, Ordelman A et al. Myeloid marker S100A8/A9 and lymphocyte marker, soluble interleukin 2 receptor: biomarkers of hidradenitis suppurativa disease activity? *Br J Dermatol*. 2013 Jun;168(6):1252-8. doi: 10.1111/bjd.12234. PMID: 23320892.

106. Vossen ARJV, van der Zee HH, Tsoi LC et al. Novel cytokine and chemokine markers of hidradenitis suppurativa reflect chronic inflammation and itch. *Allergy*. 2019 Mar;74(3):631-634. doi: 10.1111/all.13665. Epub 2018 Dec 10. PMID: 30421795; PMCID: PMC6590369.
107. Penno CA, Jäger P, Laguerre C et al. Lipidomics Profiling of Hidradenitis Suppurativa Skin Lesions Reveals Lipoxygenase Pathway Dysregulation and Accumulation of Proinflammatory Leukotriene B4. *J Invest Dermatol*. 2020 Dec;140(12):2421-2432.e10. doi: 10.1016/j.jid.2020.04.011. Epub 2020 May 5. PMID: 32387270.
108. Pacific KP, AAD Annual meeting. United States PP AB61, 2020
109. Kelly AM, Cronin P. MRI features of hidradenitis suppurativa and review of the literature. *AJR Am J Roentgenol*. (2005) 185:1201-4. 10.2214/AJR.04.123
110. Zouboulis CC, Nogueira da Costa A, Jemec GBE, Trebing D. Long-Wave Medical Infrared Thermography: A Clinical Biomarker of Inflammation in Hidradenitis Suppurativa/Acne Inversa. *Dermatology*. 2019;235(2):144-149. doi: 10.1159/000495982.
111. Alatas ET, Biteker M, Alatas OD. Epicardial fat thickness is increased and associated with disease severity in hidradenitis suppurativa. *Arch Dermatol Res*. 2020 Sep;312(7):467-472. doi: 10.1007/s00403-019-02032-6. Epub 2020 Jan 1. PMID: 31894390. Epub 2019 Jan 16. PMID: 30650424.
112. Abdalla T, Mansour M, Bouazzi D, Lowes MA, Jemec GBE, Alavi A. Therapeutic Drug Monitoring in Patients with Suboptimal Response to Adalimumab for Hidradenitis Suppurativa: A Retrospective Case Series. *Am J Clin Dermatol*. 2020 Nov 26. doi: 10.1007/s40257-020-00575-3. Epub ahead of print. PMID: 33242185.
113. Banerjee A, McNish S, Shanmugam VK. Interferon-gamma (IFN- $\gamma$ ) is Elevated in Wound Exudate from Hidradenitis Suppurativa. *Immunol Invest*. 2017 Feb;46(2):149-158. doi: 10.1080/08820139.2016.1230867. Epub 2016 Nov 7. PMID: 27819528; PMCID: PMC5767159.

114. Thomi R, Yerly D, Yawalkar N, Simon D, Schlapbach C, Hunger RE. Interleukin-32 is highly expressed in lesions of hidradenitis suppurativa. *Br J Dermatol*. 2017 Nov;177(5):1358-1366. doi: 10.1111/bjd.15458. Epub 2017 Sep 27. PMID: 28301691.
115. Thomi R, Kakeda M, Yawalkar N, Schlapbach C, Hunger RE. Increased expression of the interleukin-36 cytokines in lesions of hidradenitis suppurativa. *J Eur Acad Dermatol Venereol*. 2017 Dec;31(12):2091-2096. doi: 10.1111/jdv.14389. Epub 2017 Aug 29. PMID: 28602023.
116. Hessam S, Sand M, Gambichler T, Skrygan M, Rüdell I, Bechara FG. Interleukin-36 in hidradenitis suppurativa: evidence for a distinctive proinflammatory role and a key factor in the development of an inflammatory loop. *Br J Dermatol*. 2018 Mar;178(3):761-767. doi: 10.1111/bjd.16019. Epub 2018 Jan 31. PMID: 28975626
117. Frew JW, Lowes MA, Goldfarb N, Butt M, Piguet V, O'Brien E, Ingram J, Jemec GBE, Tan J, Zouboulis C, Alavi A, Kirby JS. Global Harmonization of Morphological Definitions in Hidradenitis Suppurativa for a Proposed Glossary. *JAMA Dermatol*. 2021 Mar 10. doi: 10.1001/jamadermatol.2020.5467. Epub ahead of print. PMID: 33688910.
118. Naik HB, Lowes MA. A Call to Accelerate Hidradenitis Suppurativa Research and Improve Care-Moving Beyond Burden. *JAMA Dermatol*. 2019 Jul 10. doi: 10.1001/jamadermatol.2019.1105. Epub ahead of print. PMID: 31290934.
119. Cao Y, Hong F, Conlon DM, Sidur L, Smith KM, Fang Y et al Potential Predictive Biomarkers of Adalimumab Response in Patients with Hidradenitis Suppurativa. *Br J Dermatol* 2021; doi: 10.1111/bjd.20097
